# Supplementary material
Source: publisher figshare collection journal article supplement (https://sage.figshare.com/ndownloader/files/19146833)
Supplement: Supplementary file 1 [file 19146833]

1

**Supp. Table 1.** Analysis of initial serum titer and treatment outcomes in patients with elevated serum titer

| RPR titers | Decreased titer<br>4-fold | Decreased titer by<br>2-fold | No change<br>or increased | seroreversion |
|------------|---------------------------|------------------------------|---------------------------|---------------|
| ≤1:2       | 5 (12.5%)                 | 2 (5%)                       | 2 (5%)                    | 0 (0)         |
| 1:4        | 6 (15%)                   | 0 (0)                        | 4 (10%)                   | 0 (0)         |
| 1:8        | 1 (2.5%)                  | 2 (5%)                       | 4 (10%)                   | 0 (0)         |
| 1:16       | 4 (10%)                   | 1 (2.5%)                     | 2 (5%)                    | 0 (0)         |
| 1:32       | 0 (0)                     | 2 (5%)                       | 2 (5%)                    | 0 (0)         |
| 1:64       | 0 (0)                     | 2 (5%)                       | 0 (0)                     | 0 (0)         |
| ≥1:128     | 1 (2.5%)                  | 0 (0)                        | 0 (0)                     | 0 (0)         |

2

Data presented as n (%)

3

Note: The result is compared between serum titer of patients at 6 months with serum titers at 3 months

4
